# Supplementary material for: Application of Efficient Data Cleaning Using Text Clustering for Semistructured Medical Reports to Large-Scale Stool Examination Reports: Methodology Study
Source: PubMed Central journal article supplement (PMC6329435; doi:10.2196/10013), 2019-01-08
Supplement: jmir_v21i1e10013_app1.pdf [file jmir_v21i1e10013_app1.pdf]

**Multimedia Appendix 1.** Patterns of parasite names in stool examination reports.

| Helminth                       |                 | Protozoa                     |                 |
|--------------------------------|-----------------|------------------------------|-----------------|
| Patterns in raw data           | Number of words | Patterns in raw data         | Number of words |
| <b>Negative<sup>a</sup></b>    | 567,836         | <b>Negative<sup>a</sup></b>  | 560,450         |
| Negaitve <sup>b</sup>          | 1               | Negative <sup>b</sup>        | 1               |
| Negative <sup>b</sup>          | 1               | Negativ <sup>b</sup>         | 1               |
| Native <sup>b</sup>            | 1               | <b>Entamoeba<sup>a</sup></b> | 2904            |
| <b>Sinensis<sup>a</sup></b>    | 4225            | Entameoba <sup>b</sup>       | 12              |
| Cinensis <sup>b</sup>          | 1               | Entameba <sup>b</sup>        | 2               |
| Sinesis <sup>b</sup>           | 3               | Entanoeba <sup>b</sup>       | 1               |
| <b>Clonorchis<sup>a</sup></b>  | 4223            | Etamoeba <sup>b</sup>        | 1               |
| Clonochis <sup>b</sup>         | 2               | Enatamoeba <sup>b</sup>      | 1               |
| Clornorchis <sup>b</sup>       | 1               | Entamoba <sup>b</sup>        | 1               |
| Clonrochis <sup>b</sup>        | 1               | Entomoeba <sup>b</sup>       | 1               |
| Clnorchis <sup>b</sup>         | 1               | <b>Coli<sup>a</sup></b>      | 2776            |
| Clonrchis <sup>b</sup>         | 1               | Colie <sup>b</sup>           | 1               |
| <b>Trichuris<sup>a</sup></b>   | 792             | Col <sup>b</sup>             | 1               |
| Trichurus <sup>b</sup>         | 2               | <b>Endolimax<sup>a</sup></b> | 9664            |
| <b>Trichiura<sup>a</sup></b>   | 791             | Endolimaxs <sup>b</sup>      | 2               |
| Trichura <sup>b</sup>          | 2               | Edolimax <sup>b</sup>        | 1               |
| Trichria <sup>b</sup>          | 1               | Nedolimax <sup>b</sup>       | 1               |
| <b>Metagonimus<sup>a</sup></b> | 689             | Nendolimax <sup>b</sup>      | 1               |
| Mtagonimus <sup>b</sup>        | 1               | Eolimax <sup>b</sup>         | 1               |
| Nmetagonimus <sup>b</sup>      | 1               | Endolix <sup>b</sup>         | 1               |
| <b>Yokogawai<sup>a</sup></b>   | 684             | <b>Nana<sup>a</sup></b>      | 9673            |
| Yokogawa <sup>b</sup>          | 4               | Nan <sup>b</sup>             | 2               |
| Yokogawi <sup>b</sup>          | 1               | Nanae <sup>b</sup>           | 1               |

|  |                                 |     |  |                                 |     |
|--|---------------------------------|-----|--|---------------------------------|-----|
|  | Yokogawaie <sup>b</sup>         | 1   |  | Nanac <sup>b</sup>              | 1   |
|  | Yokogowai <sup>b</sup>          | 1   |  | <b>Lambli</b> <sup>a</sup>      | 870 |
|  | Gymnophalloides <sup>a</sup>    | 175 |  | Lamdli <sup>b</sup>             | 1   |
|  | Seoi <sup>a</sup>               | 175 |  | G.lambli <sup>b</sup>           | 1   |
|  | Ascaris <sup>a</sup>            | 19  |  | <b>Giardia</b> <sup>a</sup>     | 870 |
|  | Lumbricoides <sup>a</sup>       | 19  |  | Girdia <sup>b</sup>             | 2   |
|  | Diphyllobothrium <sup>a</sup>   | 8   |  | <b>Histolytica</b> <sup>a</sup> | 138 |
|  | Latum <sup>a</sup>              | 8   |  | Histolytoca <sup>b</sup>        | 1   |
|  | Enterobius <sup>a</sup>         | 6   |  |                                 |     |
|  | Vermicularis <sup>a</sup>       | 6   |  |                                 |     |
|  | Paragonimus <sup>a</sup>        | 4   |  |                                 |     |
|  | Westermani <sup>a</sup>         | 3   |  |                                 |     |
|  | Hookworm <sup>a</sup>           | 1   |  |                                 |     |
|  | <b>Hymenolepis</b> <sup>a</sup> | 1   |  |                                 |     |
|  | Hymenolepsis <sup>b</sup>       | 3   |  |                                 |     |
|  | Entamoeba <sup>a</sup>          | 1   |  |                                 |     |
|  | Nana <sup>a</sup>               | 4   |  |                                 |     |
|  | Diminuta <sup>a</sup>           | 1   |  |                                 |     |
|  | Trichostrongylus <sup>a</sup>   | 1   |  |                                 |     |
|  | Parasite <sup>a</sup>           | 9   |  |                                 |     |
|  | <b>Egg</b> <sup>a</sup>         | 6   |  |                                 |     |
|  | Eggs <sup>b</sup>               | 3   |  |                                 |     |

<sup>a</sup>Pattern of correct word (n=30).

<sup>b</sup>Typing error or duplicate (n=45).
